# Supplementary material for: Self management of patients with mild COPD in primary care: randomised controlled trial
Source: PubMed Central journal article supplement (PMC5998171; doi:10.1136/bmj.k2241), 2018-06-13

## Web appendix 1: Outline of the intervention components

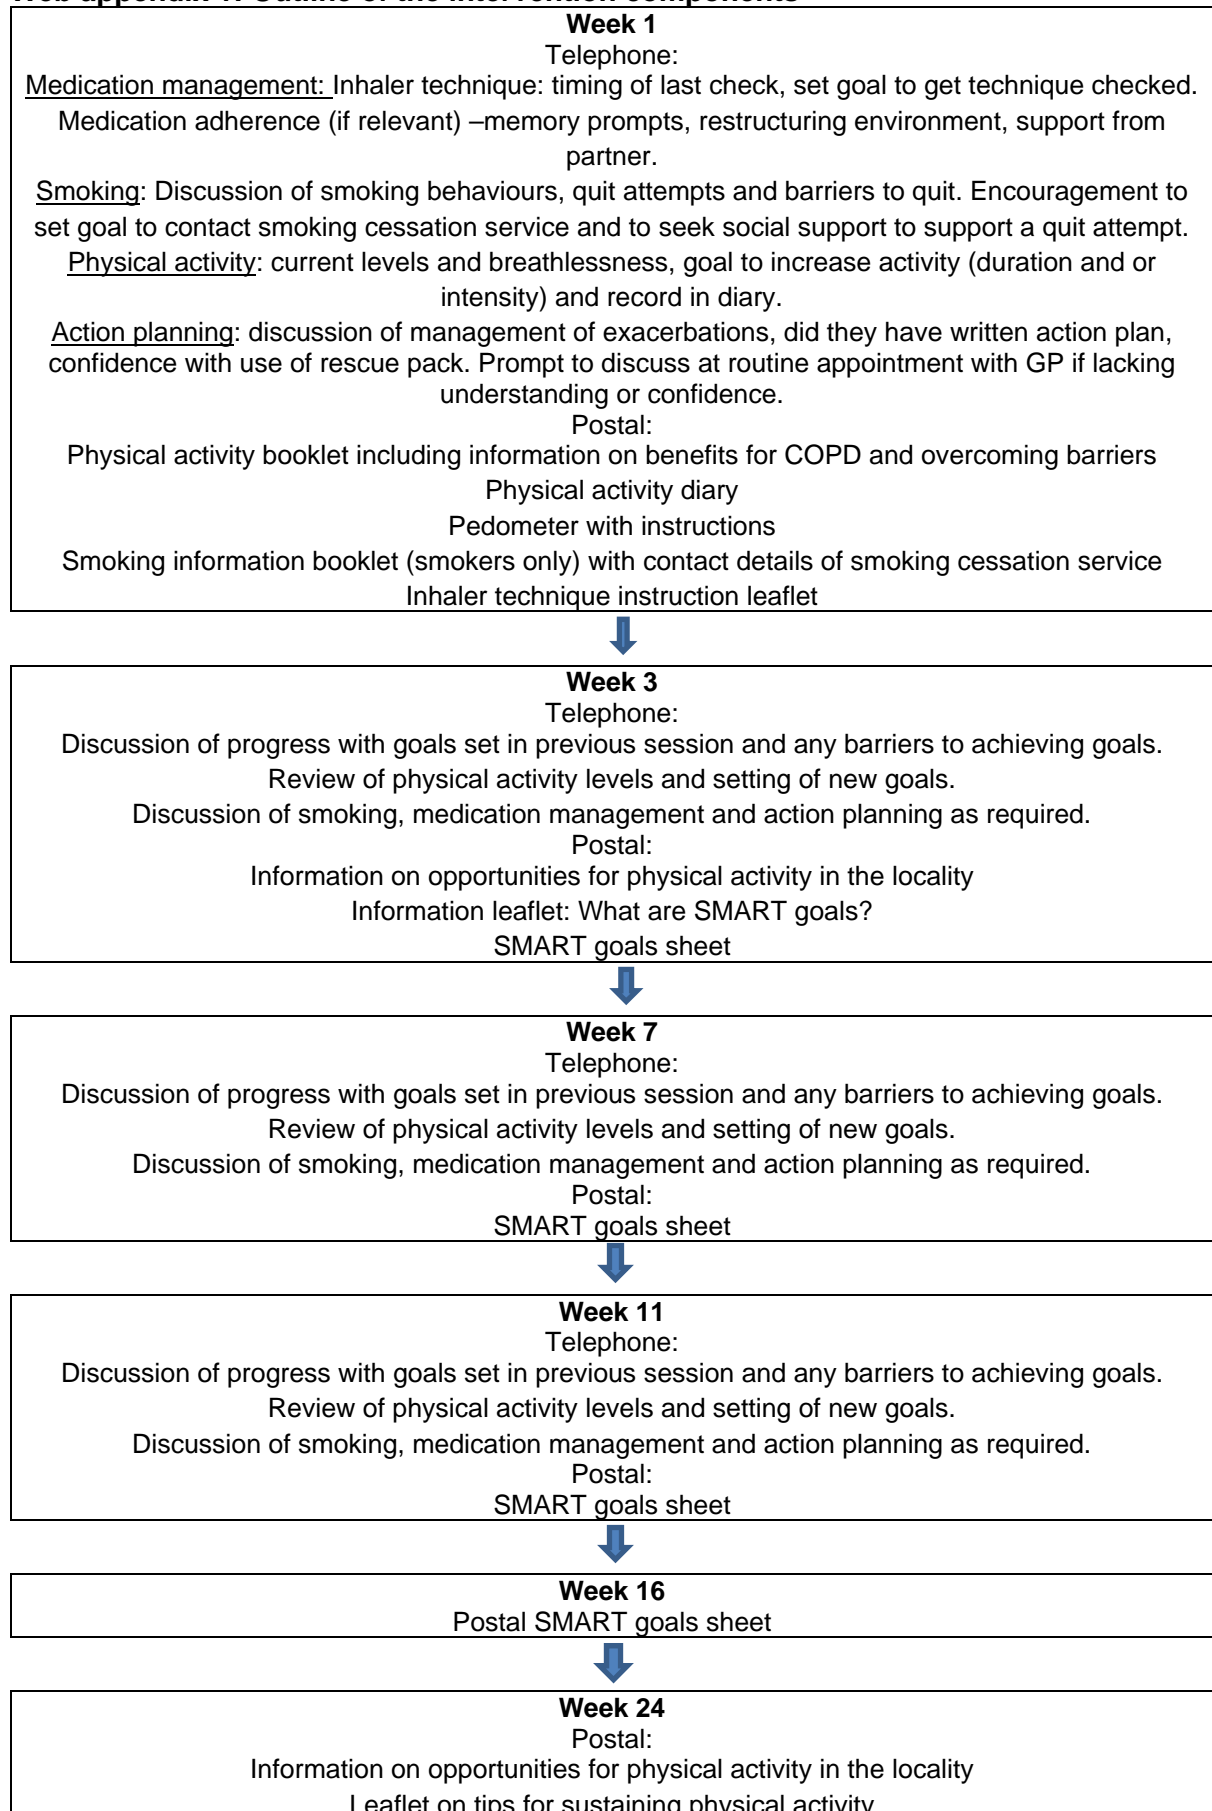

Supplement: jolk042829.ww1.pdf [file jolk042829.ww1.pdf]
