# Supplementary material for: Self management of patients with mild COPD in primary care: randomised controlled trial
Source: PubMed Central journal article supplement (PMC5998171; doi:10.1136/bmj.k2241), 2018-06-13
Supplement: jolk042829.ww2.pdf [file jolk042829.ww2.pdf]

## **Web appendix 2: Accelerometry methods and adherence**

At the baseline assessment a GENEactiv accelerometer was fitted on the participant's non-dominant wrist, which they were asked to return by post in a pre-paid envelope after 7 days of continuous wear. At 12 month follow-up accelerometers were posted to participants with a follow-up telephone call to explain how to start the recording. They were asked to wear them continuously for 7 days and return them by post. Non-responders were telephoned and given the option of completing the questionnaire over the telephone.

### *Analysis*

Data were collected in 60 second epochs. In order to be considered a valid day, participants needed to wear the accelerometer for at least 10 waking hours. A minimum of 5 days of valid data was necessary for inclusion in the final analysis. The criterion for non-wear was 120 minutes of zero counts. The default cut-points for adult physical activity were used to determine the amount of time spent in moderate to vigorous physical activity. These cut-points in g·min were 483 for the threshold from sedentary to light activity, 678 for moderately intense activity and 2264 for vigorous activity.

### *Adherence*

At baseline 535 participants returned an accelerometer with data on, of which 522 (90.5%) had valid data for inclusion in the analyses. At 12 months follow-up, 416 accelerometers were returned with data, of which 411 had valid data for analysis; this was 71.2% of the initial sample.
