# Supplementary material for: Self management of patients with mild COPD in primary care: randomised controlled trial
Source: PubMed Central journal article supplement (PMC5998171; doi:10.1136/bmj.k2241), 2018-06-13
Supplement: jolk042829.ww3.pdf [file jolk042829.ww3.pdf]

### Web appendix 3: Results of sensitivity analyses for the PSM-COPD study

|                                                       | Baseline                   |                         | 12 months                  |                         |                                          |             |
|-------------------------------------------------------|----------------------------|-------------------------|----------------------------|-------------------------|------------------------------------------|-------------|
|                                                       | Telephone PSM<br>mean (sd) | Usual Care<br>mean (sd) | Telephone PSM<br>mean (sd) | Usual Care<br>mean (sd) | Mean difference <sup>1</sup><br>(95% CI) | p-value     |
| <b>Per-protocol analysis</b>                          |                            |                         |                            |                         |                                          |             |
| SGRQ-C total                                          | 26.5 (13.5)                | 29.5 (14.5)             | 27.6 (14.6)                | 30.8 (17.0)             | -1.4 (-3.6, 0.8)                         | <b>0.2</b>  |
| SGRQ-C symptom                                        | 48.1 (21.1)                | 47.8 (20.7)             | 49.2 (21.2)                | 50.0 (22.7)             | -1.9 (-4.9, 1.2)                         | <b>0.2</b>  |
| SGRQ-C activity                                       | 34.1 (19.8)                | 38.7 (21.3)             | 33.9 (20.1)                | 39.3 (24.4)             | -2.4 (-5.6, 0.8)                         | <b>0.1</b>  |
| SGRQ-C impact                                         | 14.4 (12.3)                | 17.5 (13.9)             | 15.8 (13.8)                | 19.3 (15.6)             | -1.6 (-3.8, 0.5)                         | <b>0.1</b>  |
| <b>Analysis to assess impact of assessment window</b> |                            |                         |                            |                         |                                          |             |
| SGRQ-C total                                          | 27.1 (13.9)                | 29.1 (14.2)             | 28.1 (15.5)                | 30.7 (16.8)             | -1.1 (-3.3, 1.1)                         | <b>0.3</b>  |
| SGRQ-C symptom                                        | 48.6 (21.2)                | 47.7 (20.7)             | 49.3 (21.4)                | 50.0 (22.6)             | -1.6 (-4.7, 1.4)                         | <b>0.3</b>  |
| SGRQ-C activity                                       | 35.0 (19.9)                | 38.5 (21.1)             | 34.4 (20.7)                | 39.1 (24.2)             | -2.5 (-5.6, 0.7)                         | <b>0.1</b>  |
| SGRQ-C impact                                         | 14.8 (12.8)                | 17.0 (13.4)             | 16.4 (14.8)                | 19.2 (15.3)             | -1.1 (-3.3, 1.0)                         | <b>0.3</b>  |
| <b>Imputation to assess impact of missing data</b>    |                            |                         |                            |                         |                                          |             |
| SGRQ-C total                                          | 27.9 (14.5)                | 29.5 (14.5)             | 28.5 (15.9)                | 31.1 (17.3)             | -1.4 (-3.4, 0.6)                         | <b>0.2</b>  |
| SGRQ-C symptom                                        | 48.3 (21.8)                | 47.7 (20.5)             | 48.6 (21.1)                | 50.2 (22.4)             | -2.0 (-4.7, 0.7)                         | <b>0.1</b>  |
| SGRQ-C activity                                       | 36.3 (21.0)                | 38.5 (21.2)             | 34.7 (21.4)                | 39.2 (23.8)             | -3.0 (-5.9, -0.2)                        | <b>0.04</b> |
| SGRQ-C impact                                         | 15.5 (13.4)                | 17.6 (13.8)             | 17.5 (15.3)                | 19.9 (15.5)             | -0.9 (-2.9, 1.1)                         | <b>0.4</b>  |

<sup>1</sup>Telephone PSM compared to usual care (negative values favour Telephone PSM).
